# Supplementary material for: Highly Efficient and Stable White Light‐Emitting Diodes Using Perovskite Quantum Dot Paper
Source: PubMed Central journal article supplement (PMC6918104; doi:10.1002/advs.201902230), 2019-10-29
Supplement: ADVS-6-1902230-s001.pdf [file ADVS-6-1902230-s001.pdf]

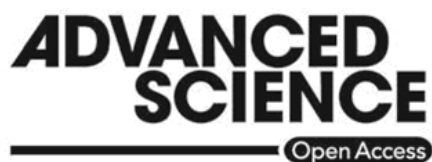

## Supporting Information

for *Adv. Sci.*, DOI: 10.1002/advs.201902230

### Highly Efficient and Stable White Light-Emitting Diodes Using Perovskite Quantum Dot Paper

*Chieh-Yu Kang, Chun-Ho Lin, Chih-Hao Lin, Ting-You Li,  
Sung-Wen Huang Chen, Chun-Lin Tsai, Chin-Wei Sher, Ting-  
Zhu Wu, Po-Tsung Lee, Xuezhu Xu, Maolin Zhang, Chih-  
Hsiang Ho,\* Jr-Hau He,\* and Hao-Chung Kuo\**

## Supporting Information

### Highly Efficient and Stable White Light-Emitting Diodes Using Perovskite Quantum

#### Dot Paper

*Chieh-Yu Kang, Chun-Ho Lin, Chih-Hao Lin, Ting-You Li, Sung-Wen Huang Chen, Chun-Lin*

*Tsai, Chin-Wei Sher, Ting-Zhu Wu, Po-Tsung Lee, Xuezhu Xu, Maolin Zhang, Chih-Hsiang Ho\*,*

*Jr-Hau He\* and Hao-Chung Kuo\**

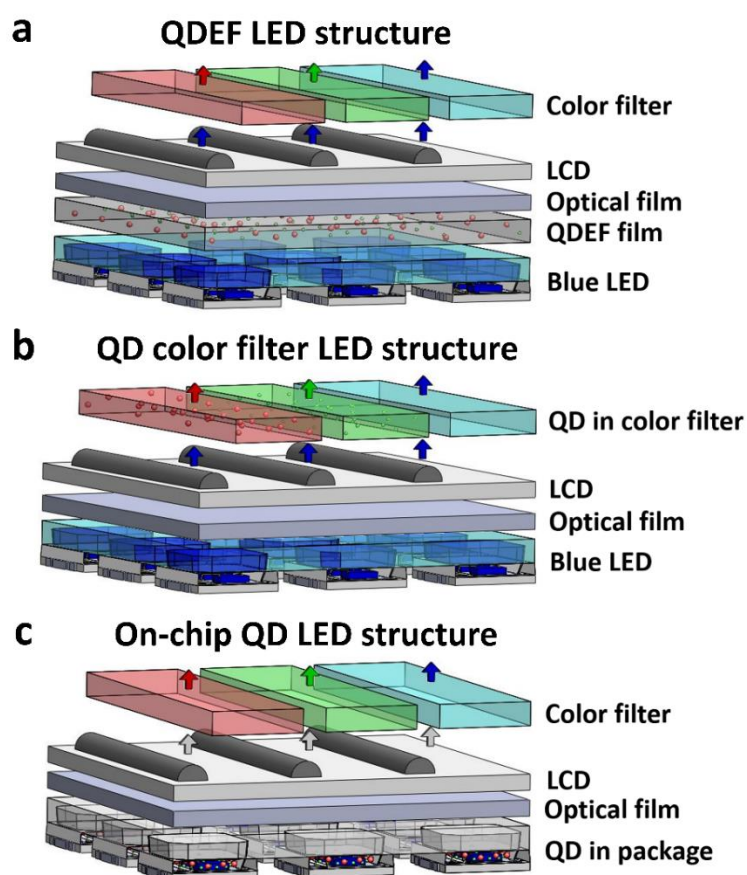

**Figure S1.** Structural schematic of different converter-type QD LEDs, including a) QDEF, b)

QD color filter, and c) on-chip QD LED structures.

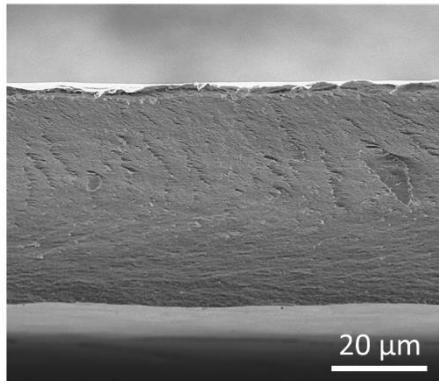

**Figure S2.** Cross-sectional SEM image, showing the thickness of the PQD paper is 45  $\mu\text{m}$ .

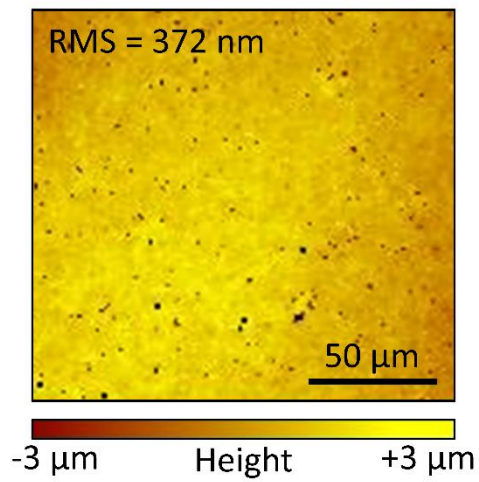

**Figure S3.** Surface morphology of PQD paper. The root-mean-square surface roughness (RMS) of PQD paper is 372 nm.

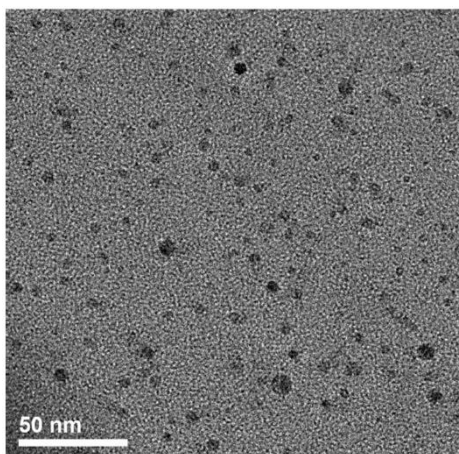

**Figure S4.** TEM image of the  $\text{CH}_3\text{NH}_3\text{PbBr}_3$  QDs obtained from the PQD paper.

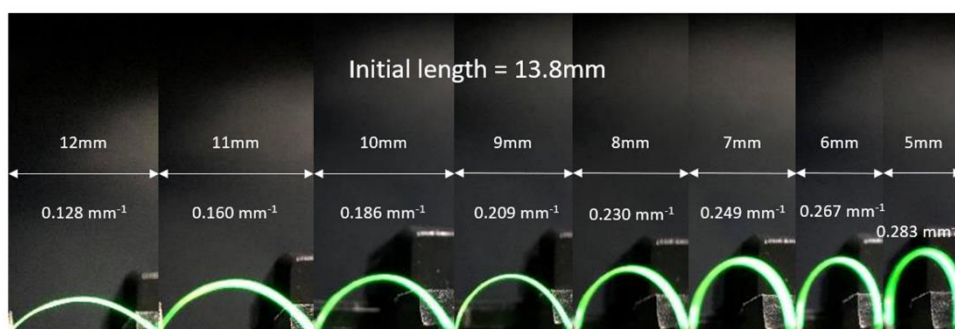

**Figure S5.** Optical photos of PQD papers under different bending curvatures.

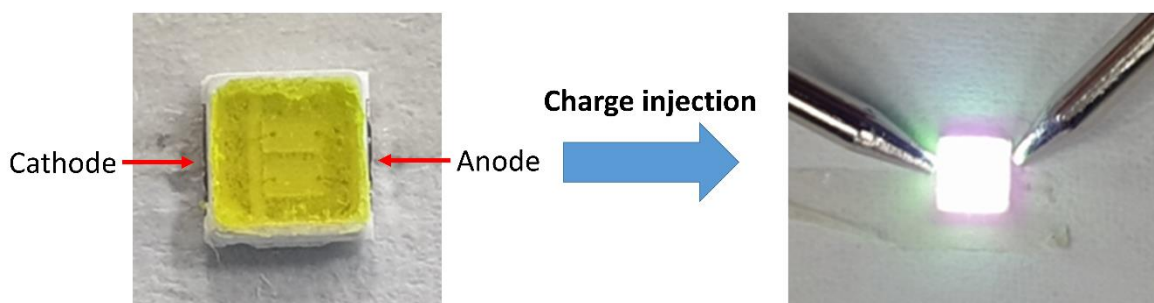

**Figure S6.** The PQD paper-based white LED can be immediately lit up by charge injection.

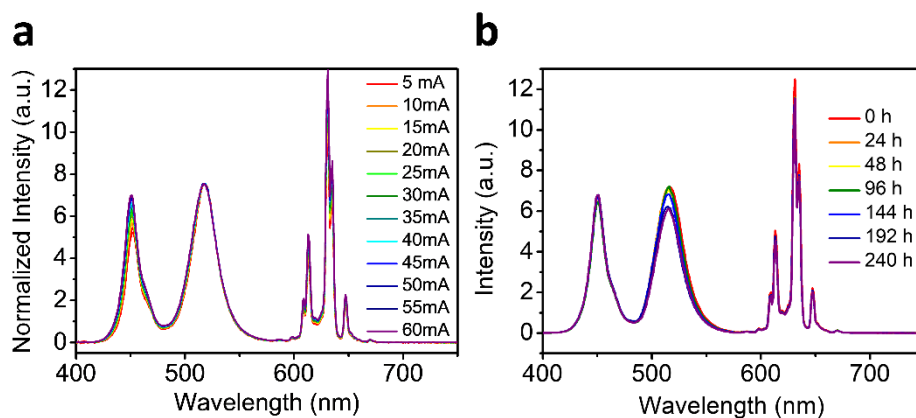

**Figure S7.** a) Normalized EL spectra of the PQD paper-based LED at different drive currents. b) EL spectra of the PQD paper-based LED under different operation durations.

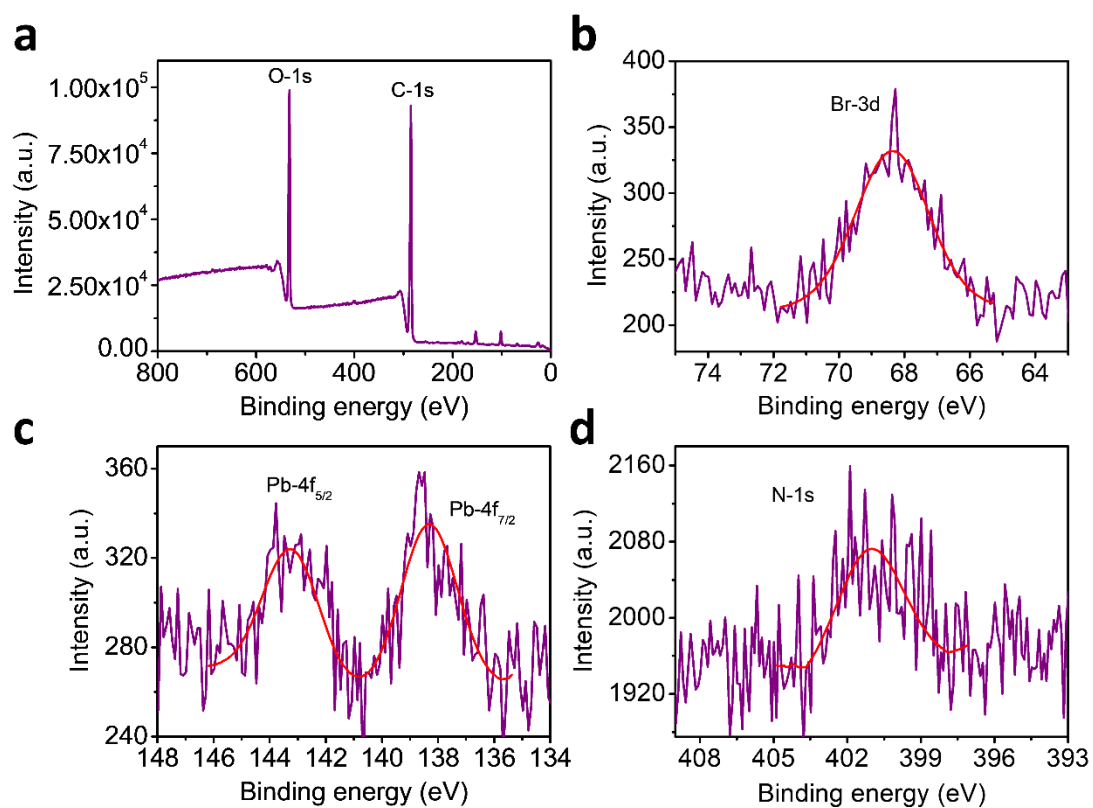

**Figure S8.** XPS spectra of PQD paper. a) Full XPS spectrum. b-c) High resolution Br-3d, Pb-4f, and N-1s XPS spectra.

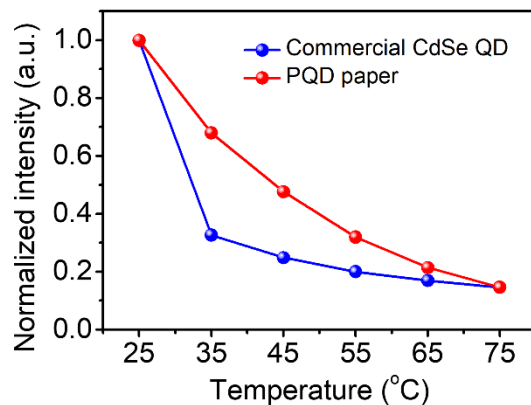

**Figure S9.** The normalized radiant intensity of the PQD paper-based and CdSe QD-based LEDs as a function of temperature, demonstrating the better thermal resistance of the PQD paper.

**Table S1.** Quantum yield of the PQD paper obtained by the PL spectrometer.

|               |                        |
|---------------|------------------------|
| Absorption    | 91.1%                  |
| Transmission  | 8.9%                   |
| Absorbance    | 1.05                   |
| Quantum Yield | 63.9%                  |
| Color         | x = 0.1379, y = 0.7429 |

**Table S2.** The luminous efficiency and color gamut of QD-based white LEDs.

| Ref  | Year | Material                                                                                                                                                                                                                                                                                                      | Quantum dot type in package   | Efficiency (lm/W) | NTSC (%) |
|------|------|---------------------------------------------------------------------------------------------------------------------------------------------------------------------------------------------------------------------------------------------------------------------------------------------------------------|-------------------------------|-------------------|----------|
| [18] | 2016 | 519 nm green mesoporous PQD,<br>625 nm red PQD                                                                                                                                                                                                                                                                | Mixed in silicone resin       | 30                | 113      |
| [23] | 2016 | 523 nm mesoporous CsPbBr <sub>3</sub> /SDDA in PMMA,<br>630 nm KSF                                                                                                                                                                                                                                            | Powders type                  | 37                | 102      |
| [9]  | 2016 | 522 nm & 624 nm perovskite, QD/silica composites                                                                                                                                                                                                                                                              | Powders type                  | 61                | 120      |
| [24] | 2015 | 515 nm colloidal CH <sub>3</sub> NH <sub>3</sub> PbBr <sub>3</sub> QDs, 630 nm KSF                                                                                                                                                                                                                            | PQD in PMMA, KSF in silicone, | 48                | 130      |
| [25] | 2016 | 525 nm MAPbX <sub>3</sub> /PVDF composite films, 630 nm KSF                                                                                                                                                                                                                                                   | PQD in PVDF, KSF in silicone, | 109               | 121      |
| [26] | 2016 | 495 nm CsPb(Br <sub>0.75</sub> Cl <sub>0.25</sub> ) <sub>3</sub> ,<br>515 nm CsPbBr <sub>3</sub> ,<br>540 nm CsPb(Br <sub>0.65</sub> I <sub>0.35</sub> ) <sub>3</sub> ,<br>578 nm CsPb(Br <sub>0.5</sub> I <sub>0.5</sub> ) <sub>3</sub> ,<br>635 nm CsPb(Br <sub>0.35</sub> I <sub>0.65</sub> ) <sub>3</sub> | Film type                     | 62                | 145      |
| [39] | 2018 | 625 nm red CdSe/CdS/ZnS QD,<br>555 nm green CdSe/ZnS/CdSZnS QD                                                                                                                                                                                                                                                | Liquid type                   | 64                | 104      |
| [19] | 2019 | 519 nm Green PQD,<br>625 nm Red PQD                                                                                                                                                                                                                                                                           | Liquid + solid type (hybrid)  | 51                | 122      |

**Table S3.** The operation lifetime and radiation performance of QD-based white LEDs.

| Ref  | Year | Material                                                                                                                                     | Quantum dot type in package  | Operation time (h) | Radiation remained |
|------|------|----------------------------------------------------------------------------------------------------------------------------------------------|------------------------------|--------------------|--------------------|
| [18] | 2016 | 519 nm green mesoporous PQD, 625 nm red PQD                                                                                                  | Mixed in silicone resin      | 96                 | 80%                |
| [10] | 2018 | 407 nm Cs <sub>3</sub> Bi <sub>2</sub> Br <sub>9</sub> QDs/silica composites, 551 nm Y <sub>3</sub> Al <sub>5</sub> O <sub>12</sub> phosphor | Powders type                 | 16                 | 78%                |
| [9]  | 2016 | 522 nm & 624 nm perovskite QD/silica composites                                                                                              | Powders type                 | 10                 | 90%                |
| [42] | 2017 | 525 nm TDPA coated CsPbBr <sub>3</sub> QD, 630 nm KSF                                                                                        | Mixed in silicone resin      | 16                 | 93%                |
| [43] | 2018 | 630 nm CsPbBr <sub>1.2</sub> I <sub>1.8</sub> QD, 540 nm Y <sub>3</sub> Al <sub>5</sub> O <sub>12</sub> :Ce <sup>3+</sup> phosphor           | Liquid type                  | 100                | 95%                |
| [19] | 2019 | 519 nm Green PQD, 625 nm Red PQD                                                                                                             | Liquid + solid type (hybrid) | 200                | 88%                |
